# Supplementary material for: Analyses of the pericyte transcriptome in ischemic skeletal muscles
Source: Research Square preprint supplement (doi:10.21203/rs.3.rs-130210/v1), 2020-12-21
Supplement: Supplementary file 1 [file 68637639d865860f311415bc.xlsx]

## Sheet: Sheet1
Additional file 1. The result of GO and KEGG enrichment analyses of individual profiles
Profile	GO (Biological process)	KEGG	GO (Cellular component)	GO (Molecular function)
1	Muscle contraction, muscle system process, smooth muscle contraction, synapse organization, regulation of muscle contraction, synaptic membrane adhesion, regulation of blood circulation, multicellular organismal signaling, blood circulation, regulation of smooth muscle contraction, circulatory system process, striated muscle contraction, regulation of neurotransmitter secretion, neurotransmitter …	Hypertrophic cardiomyopathy (HCM), Cell adhesion molecules (CAMs), Circadian rhythm, Dilated cardiomyopathy (DCM),	actomyosin, integral component of postsynaptic membrane, intrinsic component of synaptic membrane, integral component of synaptic membrane, intrinsic component of postsynaptic membrane, Schaffer collateral - CA1 synapse, cell-cell junction, actin cytoskeleton, postsynaptic membrane, stress fiber, contractile actin filament bundle, actin filament bundle, apical part of cell, neuron to neuron synap…	Actin binding, metal ion transmembrane transporter activity
0	Muscle system process, blood circulation, circulatory system process, muscle contraction, regulation of membrane potential, regulation of blood circulation, regulation of heart contraction, heart contraction, regulation of metal ion transport, heart process, regulation of muscle system process, second-messenger-mediated signaling, actin filament-based movement, cell junction organization, actin-m…	cGMP-PKG signaling pathway, Vascular smooth muscle contraction, Adrenergic signaling in cardiomyocytes, Salivary secretion, cAMP signaling pathway, Focal adhesion, Calcium signaling pathway, Platelet activation, Aldosterone synthesis and secretion, Insulin secretion, Gastric acid secretion, Renin secretion, Rap1 signaling pathway, Oxytocin signaling pathway, Circadian entrainment, MAPK signaling …	cell-cell junction, contractile fiber part, contractile fiber, adherens junction, sarcomere, myofibril, anchoring junction, cell-cell contact zone, sarcoplasmic reticulum, Z disc, actin filament bundle, sarcoplasm, I band, actin cytoskeleton, cell-cell adherens junction, intercalated disc, stress fiber, contractile actin filament bundle, transmembrane transporter complex, sarcolemma	actin binding, metal ion transmembrane transporter activity, cation channel activity, substrate-specific channel activity, ion channel activity, channel activity, passive transmembrane transporter activity, monovalent inorganic cation transmembrane transporter activity, actin filament binding, ion gated channel activity, cell adhesion molecule binding, potassium ion transmembrane transporter acti…
12	Collagen fibril organization, bone development, extracellular matrix organization, collagen metabolic process, endochondral bone morphogenesis, extracellular structure organization, bone morphogenesis, protein heterotrimerization, cartilage development involved in endochondral bone morphogenesis, skeletal system morphogenesis, chondrocyte development involved in endochondral bone morphogenesis, c…	Protein digestion and absorption, ECM-receptor interaction, PI3K-Akt signaling pathway, Fanconi anemia pathway, Homologous recombination, Focal adhesion	extracellular matrix, collagen-containing extracellular matrix, collagen trimer, extracellular matrix component, fibrillar collagen trimer, banded collagen fibril, complex of collagen trimers, neuromuscular junction, basement membrane	extracellular matrix structural constituent, extracellular matrix structural constituent conferring tensile strength, platelet-derived growth factor binding, collagen binding, transition metal ion transmembrane transporter activity, divalent inorganic cation transmembrane transporter activity, catalytic activity, acting on DNA, glucuronosyltransferase activity
2	ND	Pyrimidine metabolism, Proteoglycans in cancer, Purine metabolism, Melanogenesis	integral component of Golgi membrane, intrinsic component of Golgi membrane	ND
16	Extracellular matrix organization, extracellular structure organization, cellular carbohydrate biosynthetic process	ND	extracellular matrix, collagen-containing extracellular matrix, basement membrane, extracellular matrix component	extracellular matrix structural constituent, integrin binding, cell adhesion molecule binding, L-ascorbic acid binding, extracellular matrix binding, galactosyltransferase activity
23	Cell cycle checkpoint, signal transduction involved in cell cycle checkpoint, signal transduction involved in DNA integrity checkpoint, signal transduction involved in DNA damage checkpoint, mitotic cell cycle checkpoint, signal transduction involved in G2 DNA damage checkpoint, signal transduction in response to DNA damage, DNA integrity checkpoint, nuclear division, chromosome segregation, mito…	Cell cycle	chromosomal region, chromosome, centromeric region, cell division site part, spindle, cell division site, kinetochore, cleavage furrow, MCM complex, contractile ring, condensed chromosome outer kinetochore, midbody, condensed nuclear chromosome kinetochore, replication fork, microtubule, pericentric heterochromatin, host, host cell, nucleosome, protein-DNA complex, heterochromatin	ND
3	ND	Herpes simplex virus 1 infection	ND	ND
22	Protein-DNA complex assembly, protein-DNA complex subunit organization, DNA conformation change, DNA replication-dependent nucleosome assembly, DNA replication-dependent nucleosome organization, DNA packaging, protein heterotetramerization, regulation of gene silencing, nucleosome assembly, protein heterooligomerization, double-strand break repair via break-induced replication, chromatin assembly…	Systemic lupus erythematosus, Cell cycle, Transcriptional misregulation in cancer	nuclear nucleosome, nucleosome, DNA packaging complex, MHC protein complex, protein-DNA complex, nuclear membrane, MCM complex	DNA replication origin binding
15	Tumor necrosis factor production, tumor necrosis factor superfamily cytokine production, regulation of tumor necrosis factor production, regulation of tumor necrosis factor superfamily cytokine production, myeloid leukocyte activation, myeloid cell activation involved in immune response, leukocyte migration, regulation of leukocyte mediated immunity, myeloid leukocyte migration, leukocyte activat…	Osteoclast differentiation, B cell receptor signaling pathway, Tuberculosis, Lysosome, Fc epsilon RI signaling pathway, Systemic lupus erythematosus, Leishmaniasis, Yersinia infection, Staphylococcus aureus infection, Pertussis, Platelet activation, Phagosome, Apoptosis	nuclear nucleosome	proteoglycan binding, heparan sulfate proteoglycan binding, immunoglobulin binding, peptide binding, monosaccharide binding, actin binding, phosphotyrosine residue binding,
9	Myelination, ensheathment of neurons, axon ensheathment, cell-cell adhesion via plasma-membrane adhesion molecules, regulation of GTPase activity, small GTPase mediated signal transduction, leukocyte migration, positive regulation of peptidyl-tyrosine phosphorylation	Hematopoietic cell lineage, Cell adhesion molecules (CAMs), Focal adhesion, ECM-receptor interaction, Malaria	myelin sheath, compact myelin, membrane raft, membrane microdomain, membrane region, adherens junction, anchoring junction, main axon, connexin complex, plasma membrane raft, gap junction, integrin complex, cell-cell junction, protein complex involved in cell adhesion, sarcolemma, cell-substrate junction, kinesin complex, cluster of actin-based cell projections, cell leading edge, basal part of c…	structural constituent of myelin sheath
19	Mitotic sister chromatid segregation, mitotic nuclear division, sister chromatid segregation, chromosome segregation, nuclear chromosome segregation, response to interferon-beta, cellular response to interferon-beta, nuclear division, positive regulation of cytokine production, organelle fission, defense response to virus, regulation of innate immune response, regulation of chromosome segregation…	ND	spindle, chromosome, centromeric region, kinetochore, condensed chromosome, centromeric region, spindle microtubule, mitotic spindle, chromosomal region, spindle pole, microtubule, condensed chromosome outer kinetochore, kinesin complex, phagocytic vesicle, condensed chromosome kinetochore, endocytic vesicle, lysosome, lytic vacuole, microtubule associated complex, spindle pole centrosome, conden…	histone kinase activity, scavenger receptor activity, fibronectin binding, cargo receptor activity
13	Ameboidal-type cell migration, negative regulation of B cell proliferation, endothelial cell proliferation, second-messenger-mediated signaling, epithelial cell migration, epithelium migration, tissue migration, negative regulation of mononuclear cell proliferation, negative regulation of lymphocyte proliferation, negative regulation of leukocyte proliferation, Rho protein signal transduction, ce…	Cell adhesion molecules (CAMs)	membrane raft, membrane microdomain, membrane region, caveola, basolateral plasma membrane, plasma membrane raft, microvillus membrane, actin-based cell projection, bicellular tight junction, tight junction, adherens junction, actin cytoskeleton, apical junction complex, cell projection membrane, anchoring junction, lateral plasma membrane, anchored component of membrane	lipoprotein particle binding, protein-lipid complex binding, low-density lipoprotein particle binding, PDZ domain binding, high-density lipoprotein particle binding, lipopolysaccharide binding, fibronectin binding
7	Striated muscle cell differentiation, striated muscle cell development, muscle cell differentiation, muscle cell development, cardiac muscle cell development, cardiac cell development, striated muscle tissue development, skeletal muscle thin filament assembly, cardiac myofibril assembly, skeletal myofibril assembly, muscle tissue development, muscle organ development, myofibril assembly, regulati…	Dilated cardiomyopathy (DCM), Hypertrophic cardiomyopathy (HCM), ECM-receptor interaction, Focal adhesion, Neuroactive ligand-receptor interaction, Arrhythmogenic right ventricular cardiomyopathy (ARVC), Nicotine addiction	extracellular matrix, collagen-containing extracellular matrix, contractile fiber, contractile fiber part, myofibril, sarcomere, I band, A band, Z disc, myosin filament, M band, myofilament, myosin complex, collagen trimer, striated muscle thin filament, basement membrane, myosin II complex, sarcolemma, actin cytoskeleton, extracellular matrix component	extracellular matrix structural constituent, structural constituent of muscle, insulin-like growth factor receptor binding, glycosaminoglycan binding, alpha-actinin binding, muscle alpha-actinin binding, actin filament binding, heparin binding, actinin binding, fibronectin binding, calmodulin binding, actin binding, sulfur compound binding, endopeptidase activity, receptor inhibitor activity, pro…
6	ND	ND	ND	ND
21	Myeloid leukocyte migration, leukocyte chemotaxis, neutrophil chemotaxis, neutrophil migration, leukocyte migration, granulocyte chemotaxis, granulocyte migration, cell chemotaxis, positive regulation of response to external stimulus, cytokine-mediated signaling pathway, chemokine-mediated signaling pathway, positive regulation of immune effector process, response to chemokine, cellular response …	Chemokine signaling pathway, Cytokine-cytokine receptor interaction, Viral protein interaction with cytokine and cytokine receptor, IL-17 signaling pathway, Osteoclast differentiation, NF-kappa B signaling pathway, Rheumatoid arthritis, Transcriptional misregulation in cancer, Toll-like receptor signaling pathway, Amoebiasis, Leishmaniasis, TNF signaling pathway, Legionellosis, B cell receptor si…	membrane raft, membrane microdomain, membrane region, receptor complex, integrin complex, protein complex involved in cell adhesion, transferase complex, transferring phosphorus-containing groups, plasma membrane receptor complex	chemokine activity, chemokine receptor binding, cytokine receptor binding, cytokine activity, CCR chemokine receptor binding, cytokine receptor activity, G protein-coupled receptor binding, receptor ligand activity, Toll-like receptor binding, cell adhesion molecule binding, integrin binding, non-membrane spanning protein tyrosine kinase activity, G protein-coupled chemoattractant receptor activi…
10	ND	Cholinergic synapse, Circadian entrainment, Relaxin signaling pathway, Dopaminergic synapse, Apelin signaling pathway, Various types of N-glycan biosynthesis	G-protein beta/gamma-subunit complex, voltage-gated potassium channel complex, potassium channel complex	gated channel activity, protein phosphatase 1 binding, G-protein beta-subunit binding, ion channel activity, substrate-specific channel activity, channel activity, passive transmembrane transporter activity, delayed rectifier potassium channel activity, potassium channel activity, cation channel activity, nucleobase-containing compound transmembrane transporter activity, ion gated channel activit…
